# Supplementary material for: A Statistical Method of Identifying Interactions in Neuron–Glia Systems Based on Functional Multicell Ca2+ Imaging
Source: PLOS journal article supplement (doi:10.1371/journal.pcbi.1003949), 2014-11-13
Supplement: S10 (10.1371/journal.pcbi.1003949.s010) [file journal.pcbi.1003949.s010]

| Structure                   | Constraint                                   | Description                                                          |
|-----------------------------|----------------------------------------------|----------------------------------------------------------------------|
| $q_{N_{i.d.}}$              | $\mathbf{a} = 0$ and $\mathbf{b} = 0$        | Independent neurons                                                  |
| $q_{N_{i.d.} \leftarrow G}$ | $\mathbf{a} = 0$                             | Neuron-to-glia network, where neurons are independent of one another |
| $q_N$                       | $\mathbf{b} = 0$                             | Neuronal network                                                     |
| $q_{N \leftarrow G}$        | No constraints                               | Neuron-to-glia network                                               |
| $q_{N \leftarrow G_j}$      | $b_{ik}(s) = 0, \forall k \neq j, \forall i$ | Neuron-to-glia network, where only $j$ -th glial cell exists         |
