# Supplementary material for: A Statistical Method of Identifying Interactions in Neuron–Glia Systems Based on Functional Multicell Ca2+ Imaging
Source: PLOS journal article supplement (doi:10.1371/journal.pcbi.1003949), 2014-11-13
Supplement: S12 (10.1371/journal.pcbi.1003949.s012) [file journal.pcbi.1003949.s012]

| Parameter    | Prior distribution                         | Description                              |
|--------------|--------------------------------------------|------------------------------------------|
| $a_{ij}(s)$  | Smoothness prior Eq. (3)                   | Response functions from neuron to neuron |
| $b_{ij}(s)$  | Smoothness prior Eq. (3)                   | Response functions from glia to neuron   |
| $c_{ij}(s)$  | Smoothness prior Eq. (3)                   | Response functions from neuron to glia   |
| $d_{ij}(s)$  | Smoothness prior Eq. (3)                   | Response functions from glia to glia     |
| $r_i$        | Uniform prior                              | Spontaneous activity rate of neuron $i$  |
| $v_i$        | Uniform prior                              | Bias term of glia $i$                    |
| $\sigma_i^2$ | Non-informative prior $\propto 1/\sigma_i$ | Variance of $i$ -th glial activity       |
